# Supplementary material for: Preparation of polythiophene microrods with ordered chain alignment using nanoporous coordination template
Source: Royal Society of Chemistry journal article supplement (doi:10.1039/c7py00309a), 2017-01-01
Supplement: c7py00309a1.pdf [file c7py00309a1.pdf]

**Supporting Information for  
Preparation of polythiophene microrods with ordered chain alignment  
using nanoporous coordination template**

**Takashi Kitao, Michael W. A. MacLean, Benjamin Le Ouay, Yotaro Sasaki,  
Masahiko Tsujimoto, Susumu Kitagawa, and Takashi Uemura**

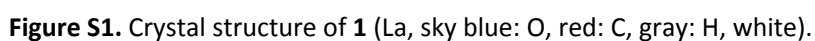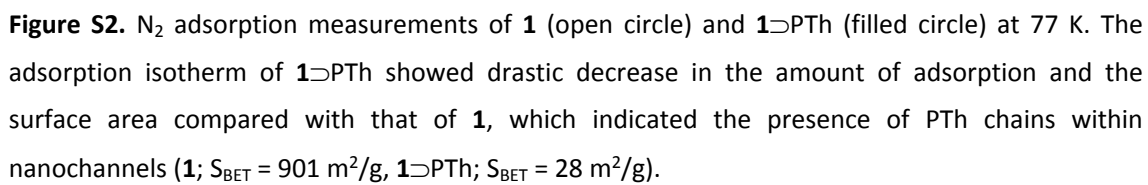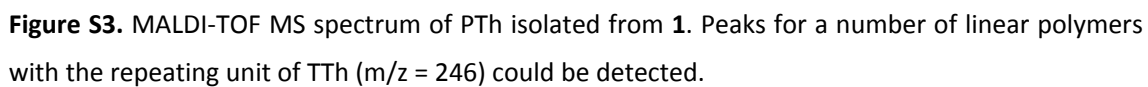

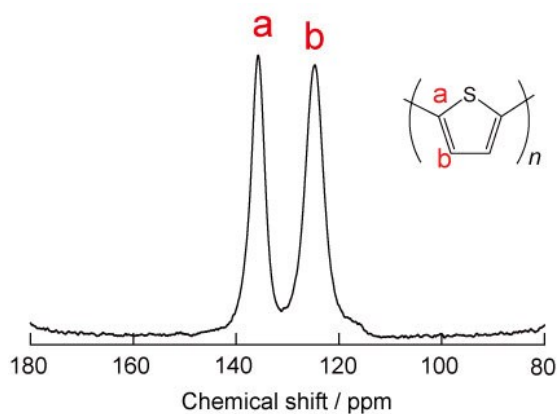

**Figure S4.** Cross polarization magic angle spinning (CP-MAS) solid state  $^{13}\text{C}$  NMR spectrum of isolated PTh from **1**. The two peaks at 136 ppm and 125 ppm are assigned to carbons at 2,5- and 3,4-position of thiophene ring, respectively. It must be noted that PTh did not show any additional peaks, indicating that linear PTh devoid of branching was obtained.<sup>1,2</sup>

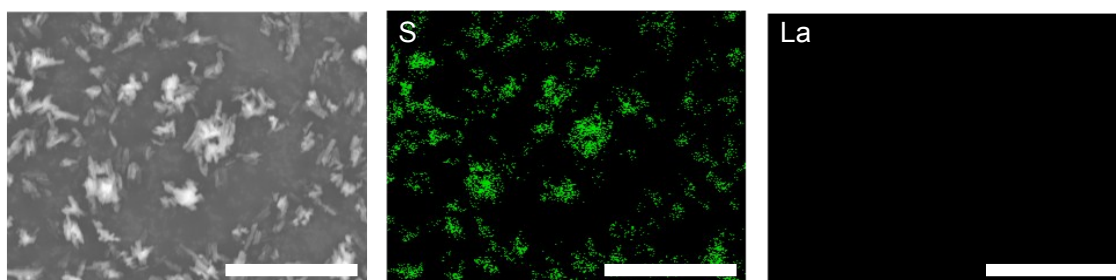

**Figure S5.** SEM image and SEM-EDX elemental maps of PTh isolated from **1**, which demonstrate the removal of **1** during the polymer recovery process. Scale bars = 25  $\mu\text{m}$ .

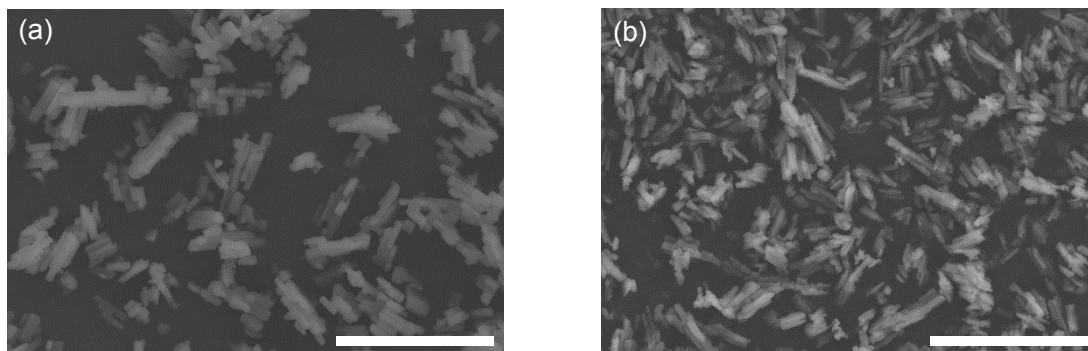

**Figure S6.** SEM images of (a) 1PTh, (b) PTh isolated from **1**. Scale bars = 20  $\mu\text{m}$ .

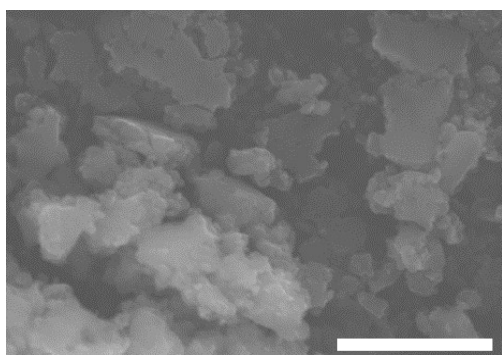

**Figure S7.** SEM image of PEDOT isolated from **1**. Scale bar = 10  $\mu\text{m}$ .

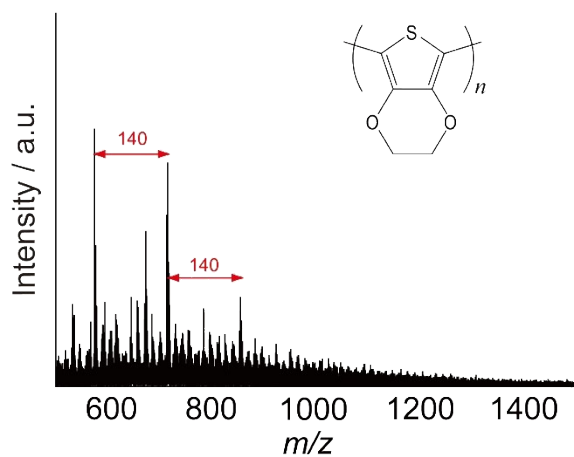

**Figure S8.** MALDI-TOF MS spectrum of PEDOT isolated from **1**. Peaks for a number of linear polymers with the repeating unit of EDOT ( $m/z = 140$ ) could be detected.

- [1] J. Chen, J. Shu, S. Schobloch, A. Kroeger, R. Graf, R. Muñoz-Espí, K. Landfester and U. Ziener, *Macromolecules*, 2012, **45**, 5108-5113.
- [2] M. Leclerc, F. M. Diaz and G. Wegner, *Makromol. Chem.*, 1989, **190**, 3105-3116.
